# Supplementary material for: Human milk oligosaccharide 2’-fucosyllactose links feedings at 1 month to cognitive development at 24 months in infants of normal and overweight mothers
Source: PLOS journal article supplement (doi:10.1371/journal.pone.0228323), 2020-02-12

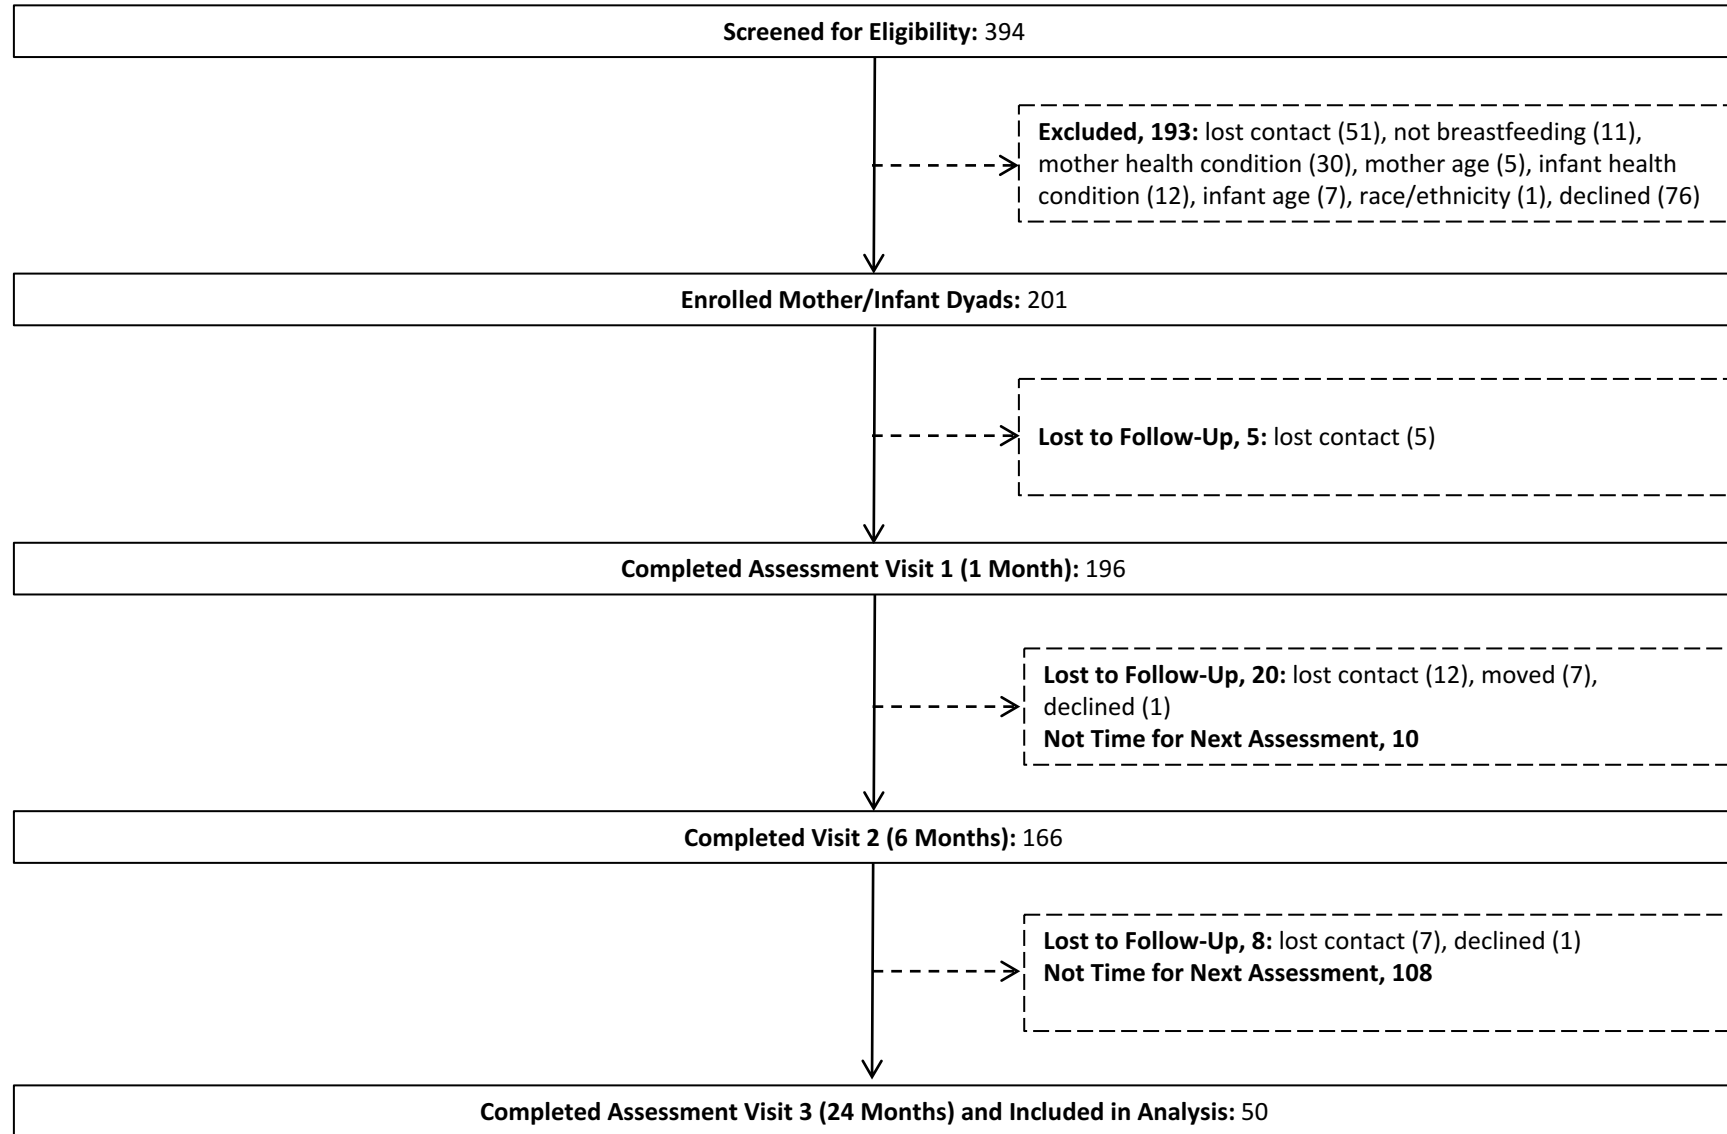

Supplement: S1 (10.1371/journal.pone.0228323.s001) [file journal.pone.0228323.s001]
